# Supplementary material for: Distinct Impairments Characterizing Different ADNP Mutants Reveal Aberrant Cytoplasmic-Nuclear Crosstalk
Source: MDPI journal article supplement (doi:10.3390/cells11192994), 2022-09-26
Supplement: s1 [file s1]

**Supplementary Materials:**  
**CRISPR/Cas9 DNA-editing**

**DNA sequence of the template for tagging ADNP with GFP (small script denotes changes made in the sgRNA sequence to avoid template degradation):**

AAGTGCACGAATGTTACAGGGtttttgtttttttttttAAAGGATCCCAGAA  
AGACAGGATTCACTGTATGTTCTGATGCCACAAACATGCTTTTTCCC  
ATCTATGTGTTTATTCTGTGGCCTATGTGAGGCCTTTGCCCTGATGTG  
TTTCCACCCAGGGAGCCAGTCCCACCACCATTTGGGACTTTGGTTTG  
AGGAGGAGACCGAAACAGTCACTGAATGACATGTGGCTTCTGTGAG  
TGTCATGGCCTTGATCAGGACATTTTCAAGATGGCAGAATCCTCCCCTC  
AGCACTGAAAGCTGAGTGATGCTGTGAAGCTCGGAGTGGCTCCAGC  
TTCGTAGGTCCAGCTTCATCGAGAGGAGACATGCGCACTCGATTTGG  
CTTTGAGATAGCTGGGTGATATTGTTGCCCTCATTTTCCAACCTCAGG  
TTCATCTCTGAACAGATTTTTACAGCTTGCTGAGACTTGTGTGCCTCG  
ACTTGTGGTCTAAAATATCCTTTTTTGAAATAGGGAAGGAAGGAAG  
GCTAACAAGCACTCACCTATTTGCCTGCTACTCTTAAGTGTTCCATAC  
TAGGCGAGGAATTCTCAACTGAtaGAGCtAtaGTTTGGGATCCTATCAT  
CAGTcaAATTAGTAACTTTTACAAGTTGTACATGTTTTGACTTTGACTT  
AAAttttttttCCAATAGAACTATGGTGAGCAAGGGCGAGGAGCTGTT  
CACCGGGGTGGTGCCCATCCTGGTCGAGCTGGACGGCGACGTAAAC  
GGCCACAAGTTCAGCGTGTCCGGCGAGGGCGAGGGCGATGCCACCT  
ACGGCAAGCTGACCCTGAAGTTCATCTGCACCACCGGCAAGCTGCC  
CGTGCCCTGGCCCAACCCTCGTGACCACCCTGACCTACGGCGTGCACT  
GCTTCAGCCGCTACCCCGACCACATGAAGCAGCACGACTTCTTCAA  
GTCCGCCATGCCCCGAAGGCTACGTCCAGGAGCGCACCATCTTCTTCA  
AGGACGACGGCAACTACAAGACCCGCGCCGAGGTGAAGTTCGAGG  
GCGACACCCTGGTGAACCGCATCGAGCTGAAGGGCATCGACTTCAA  
GGAGGACGGCAACATCCTGGGGCACAAGCTGGAGTACAACCTACAA  
CAGCCACAACGTCTATATCATGGCCGACAAGCAGAAGAACGGCATC  
AAGGTGAACCTCAAGATCCGCCACAACATCGAGGACGGCAGCGTGC  
AGCTCGCCGACCACTACCAGCAGAACACCCCCATCGGCGACGGCCC  
CGTGCTGCTGCCCCGACAACCACTACCTGAGCACCCAGTCCGCCCTG  
AGCAAAGACCCCCAACGAGAAGCGCGATCACATGGTCTCTGCTGGAGT  
TCGTGACCGCCGCGGGATCACTCTCGGCATGGACGAGCTGTACAA  
GATGTTCCAACCTTCTGTCAACAATCTTGGCAGTTTAAGAAAAGCCC  
GGAAAACGTGTGAAAAAAATACTTAGTGACATTGGGTTaGAATACTGT  
AAAGAACATATAGAAGTAAGTAGCATGCCATTTTTAAATTTTAATGT  
GACTCAGCTCCTGATCCATTACTGTGTCCATGGGCAAAGATGGTTCA  
CTAATAGGTGTGGTAGTAAATTTTAACTAGACCTTCAGCTTCACCAA  
AACCTTCTCACGTAGGATAGCTTACTTCATTTTCCCTGAAAGCCTGTT  
CATCTTGGTAACTGAGGCAAACTAATTACAGCACAGAGAATGTA  
CACAAGTCAGACAGTGCACATGGTGCTTTAAACTGTCTATGAGCTT  
TCTCCTTGAAATAACCTTTAGGGGCTCTAGGAATTCTTGTCTCCAGTC

TATGAAAGAAGAATTGGGAAAGCAGAGATGCCAGGCTCTCAGCTA  
GGGAAGGGGCAGTGAGGACTGTAGGGCCTGTTCTCCTTCTGATAGG  
CCTGGGTGTTTCTGTTGACCTGTTGAGGCACAGTCGTCTGAGTGTGTTG  
TCATCTCTTTCCTTAGGATTTGAGCACTTGTGAGCCTTCTGAACTATC  
AAAGACTTATCTTGCCCTTGTGTAACAGTTTGGCCTTTCAGACTGTTT  
CCTATCCTTTTTATTCTGAGCCTTTCAAGCCCCATAAGCTAGATAGAG  
ACGTCTCCTCCTTTTCCAGATCTCCTTGTTCCCAATCTTACAGTTAGTT  
AGACACAACCTCCCATTGAAGTGCTTACAAtctaga

**Adding GFP sgRNA sequences (small script denotes changes made in the sgRNA sequence to avoid secondary structures):**

GTTTGGGATCCTATCATCAG  
GGCGAGGAATTCTCAACTGA  
taGTTTGGGATCCTATCATC

**SSODN sequence of the template editing the Tyr718 mutation (small script denotes changes made in the sgRNA sequence to avoid template degradation and adding stop codon):**

GACAAGACAAACGCACCTTCTCGGCTCAATCA  
TCTCCAGGCCTGGCgCCTGTcAAGCGCAtTAaGAGCAaATGGAGTTTC  
CACTGCTAAAAAAGC

**Tyr718 sgRNA sequences:**

GTGAAGCGCACGTATGAGCA  
TGTGAAGCGCACGTATGAGC  
GAAGCGCACGTATGAGCAGA

**SSODN DNA sequence of the template editing the Pro403 mutation (small script denotes changes made in the sgRNA sequence to avoid template degradation and adding stop codon):**

GCAGCAGCCAGGTACTCCCTGCAGACTGCCAACACCTCTCTACcttaA  
GGCCAAGTGAAGTCTCCCTCTGTGTCTCAGTCACAGGCATCTAGAGT  
ATTA

**Pro403 sgRNA sequences:**

GCCAACACCTCTCTACCCCC  
CAGGCCAAGTGAAGTCTCCC  
CCAGGCCAAGTGAAGTCTCC

Single guide RNA (sgRNA), single-stranded oligodeoxynucleotide (SSODN)
